# Supplementary material
Source: PubMed Central journal article supplement (PMC6291656)
Supplement: ajcr0008-2254-f6.pdf [file ajcr0008-2254-f6.pdf]

## Id2 is regulated by C/EBP $\alpha$ and promotes HCC proliferation

**Supplementary Table 1.** Primers for the qRT-PCR and ChIP

| Name           | Forward (5'-3')           | Reverse (5'-3')             |
|----------------|---------------------------|-----------------------------|
| For qRT-PCR    |                           |                             |
| Id2            | TCCCCTATTGTGTCAGCCTGC     | AGAAGCCTGCAAGGACAG          |
| C/EBP $\alpha$ | TGTATACCCCTGGTGGGAGA      | TCATAACTCCGGTCCCTCTG        |
| GAPDH          | AGAAGGCTGGGGCTCATTG       | AGGGGCCATCCACAGTCTTC        |
| For ChIP       |                           |                             |
| Id2            | ATCTTCCCTTCTCTCTCCTCCCTCC | GCGAGCCCAGCTGGGGTGGTAAATAGA |

**Supplementary Table 2.** Antibodies for Western blot or ChIP

| Antibody            | Clone & host           | Dilution       | Company        |
|---------------------|------------------------|----------------|----------------|
| Id2                 | SC-489, rabbit IgG     | 1:100 for WB   | Santa Cruz     |
| C/EBP $\alpha$      | 38311-1-AP, rabbit IgG | 1:500 for WB   | Proteintech    |
| FLAG                | F2555, rabbit IgG      | 1:100 for ChIP | Sigma-Aldrich  |
| Cleaved caspase 3   | CST-9661, rabbit IgG   | 1:500 for WB   | Cell signaling |
| caspase 3           | CST-9662, rabbit IgG   | 1:500 for WB   | Cell signaling |
| HRP- $\beta$ -actin | AC-15, rabbit IgG      | 1:10000 for WB | Sigma-Aldrich  |
| HRP-anti Rabbit IgG | Goat                   | 1:4000 for WB  | Sigma-Aldrich  |

**Supplementary Table 3.** Primers for promoter cloning

| Name                            | Forward (5'-3')                 | Reverse (5'-3')                |
|---------------------------------|---------------------------------|--------------------------------|
| Id2-promoter (-1044 bp/+358 bp) | CGACGCGTCAACAACCTCTTGCCAACCTGAC | GAAGATCTTGAAGCGCGAGCCCAGAACTTA |
| Id2-promoter (-747 bp/+358 bp)  | CGACGCGTCGCCTCTGGCTAGACCGAATG   | GAAGATCTTGAAGCGCGAGCCCAGAACTTA |
| Id2-promoter (-164 bp/+358 bp)  | CGACGCGTCCGCACTTACTGTACTGT      | GAAGATCTTGAAGCGCGAGCCCAGAACTTA |
| Id2-promoter (-102 bp/+358 bp)  | CGACGCGTCACTGAGAAGGCGAGAGAATC   | GAAGATCTTGAAGCGCGAGCCCAGAACTTA |
| Id2-promoter (mutant)           | CGACGCGTCCGCCACCCATTGTGCTGT     | GAAGATCTTGAAGCGCGAGCCCAGAACTTA |
